CORRECTION

## Correction: When revealed after the fact, selfish intentions undermine prosocial actions in 5-year-olds

Kayley Dotson, Michael Tomasello

The first author, Kayley Dotson, is incorrectly noted as the corresponding author. The correct corresponding author is Michael Tomasello. Michael Tomasello's email address is: [michael.tomasello@duke.edu](mailto:michael.tomasello@duke.edu).

### Reference

1. Dotson K, Tomasello M. When revealed after the fact, selfish intentions undermine prosocial actions in 5-year-olds. PLoS One. 2026;21(3):e0344731. <https://doi.org/10.1371/journal.pone.0344731> PMID: [41849316](https://pubmed.ncbi.nlm.nih.gov/41849316/)

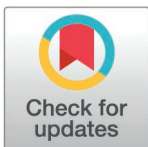

### OPEN ACCESS

**Citation:** Dotson K, Tomasello M (2026) Correction: When revealed after the fact, selfish intentions undermine prosocial actions in 5-year-olds. PLoS One 21(4): e0348092. <https://doi.org/10.1371/journal.pone.0348092>

**Published:** April 27, 2026

**Copyright:** © 2026 Dotson, Tomasello. This is an open access article distributed under the terms of the [Creative Commons Attribution License](https://creativecommons.org/licenses/by/4.0/), which permits unrestricted use, distribution, and reproduction in any medium, provided the original author and source are credited.
